# Supplementary material
Source: publisher figshare collection journal article supplement (https://scielo.figshare.com/articles/dataset/_/7591322)
Supplement: Supplementary file 1 [file Table_1.xls]

## Sheet: Table_1
<b>Ferramenta</b>	<b>Definição</b>	<b>Uso educacional</b>
Mural	É um local público de publicações. É o local de abertura quando se acessa determinado grupo.	Postar comunicados importantes, mensagens em geral e anúncios. Alunos podem responder aos <em>posts</em> diretamente ou curtir uma postagem.
Eventos	Esta função permite criar lembretes para os membros do grupo.	Lembrar os alunos de provas, reuniões ou sessões de estudo, encontros.
Documentos	Esta ferramenta permite submeter arquivos para <em>download</em> ou criar documentos de texto compartilhados.	Instrutores podem compartilhar matérias para leitura e estudos, tais como documentos, apresentações, aulas, imagens, etc.
Bate-papo	É uma ferramenta síncrona similar aos comunicadores instantâneos tradicionais.	Comunicar-se com os estudantes em tempo real.
