# Supplementary material
Source: publisher figshare collection journal article supplement (https://scielo.figshare.com/articles/dataset/_/7591322)
Supplement: Supplementary file 2 [file Table_2.xls]

## Sheet: Table_2
<b>Variável</b>	<b>Categorias</b>	<b>Frequência absoluta (n)</b>	<b>Frequência relativa (%)</b>	<b>p-valor</b>
Sexo	Feminino	180	58,1	0,005
	Masculino	130	41,9
Período do curso	4º	7	2,3	< 0,0001
	5º	54	17,4
	6º	61	19,7
	7º	19	6,1
	8º	73	23,5
	9º	4	1,3
	10º	51	16,5
	11º	36	11,6
	12º	5	1,6
Posse de dispositivos eletrônicos móveis	<em>Notebook</em>	288	95,4	< 0,0001
	<em>Smartphone</em>	271	88,9
	<em>Tablet</em>	174	59,8
	<em>Desktop</em>	60	20,0
	Celular	68	22,6
	Não	22	7,1
Curso superior prévio	Sim – incompleto	40	12,9	< 0,0001
	Sim – completo	8	2,6
	Não	262	84,5
Idiomas que você domina (engloba ler, falar ou escrever)	Espanhol	4	1,3	< 0,0001
	Inglês	133	42,9
	Inglês e espanhol	124	39,9
	Inglês, espanhol e outro	22	7,1
	Inglês e outro	25	7,9
	Outro	1	0,3
Hábito de leitura favorito utilizado para estudar	Texto digital	92	29,7	<0,0001
	Texto impresso	37	11,9
	Ambos	181	58,4
Fontes de informação	Artigos de periódico	274	88,4	<0,0001
	<em>Guidelines</em> /diretrizes	230	74,2
	<em>Textbooks/handbooks</em>	83	26,8
	Livros	193	62,3
	Outros	31	10,0
Bases de dados	Bireme	21	6,8	<0,0001
	Cochrane	56	18,1
	SciELO	209	85,8
	UpToDate	193	62,3
	Web of Science	26	8,7
	PubMed	271	87,4
	Lilacs	37	11,9
	Portal Capes	42	14,5
	ACP Medicine/Outros	13	3,5
