# Supplementary material
Source: publisher figshare collection journal article supplement (https://scielo.figshare.com/articles/dataset/_/7591322)
Supplement: Supplementary file 3 [file Table_3.xls]

## Sheet: Table_3
<b>Variável</b>	<b>Categoria</b>	<b>Frequência (n)</b>	<b>Frequência relativa (%)</b>	<b>p-valor</b>
Redes sociais utilizadas	Facebook	308	99,7	< 0,0001
	Instagram	61	23,6
	Google+	92	35,8
	YouTube	233	90,7
	Snapchat	11	4,3
	Twitter	25	9,7
	Linkedin	11	4,3
	Outros (Tumblr, Snop, VK, Pinterest, Reddit)	9	3,5
Recursos de comunicação utilizados	WhatsApp e Facebook	159	51,3	<0,0001
	Facebook, WhatsApp e Skype	125	40,3
	Facebook e Skype	3	1
	Facebook, WhatsApp e outros	8	2,6
	Somente Facebook	7	2,3
	Somente WhatsApp	8	2,6
Frequência do uso do Facebook	1 x semana	27	8,7	< 0,0001
	3 x semana	68	21,9
	Nunca	5	1,6
	Raramente	22	7,1
	Todos os dias	188	60,6
