# Supplementary material
Source: publisher figshare collection journal article supplement (https://scielo.figshare.com/articles/dataset/_/7591322)
Supplement: Supplementary file 4 [file Table_4.xls]

## Sheet: Table_4
<b>Ferramentas do Facebook</b>	<b>Frequência absoluta (n)</b>	<b>Frequência relativa (%)</b>	<b>p-valor</b>
Documentos	261	84,2	< 0,0001
Mural	172	55,5
Bate-papo	155	50,0
Eventos	88	49,0
