# Supplementary material
Source: publisher figshare collection journal article supplement (https://scielo.figshare.com/articles/dataset/_/7591322)
Supplement: Supplementary file 5 [file Table_5.xls]

## Sheet: Table_5
<b>Categoria</b>	<b>Frequência (n)</b>	<b>Frequência relativa (%)</b>	<b>p-valor</b>
Verificar avisos com representantes, atualizar cronograma	305	92,6	< 0,0001
Resolver exercícios e/ou tirar dúvidas para fazer trabalho <em>on-line</em>	284	91,6
Obter matéria dada em aula	235	60,0
Discutir casos clínicos	99	31,9
